# Supplementary material for: Capecitabine and Oxaliplatin for Advanced Esophagogastric Cancer
Source: Atypon-hosted journal article supplement (doi:10.1056/nejmoa073149), 2008-01-03
Supplement: nejm_cunningham_36sa1.pdf [file nejm_cunningham_36sa1.pdf]

## Supplementary Appendix

This appendix has been provided by the authors to give readers additional information about their work.

Supplement to: Cunningham D, Starling N, Rao S, et al. Capecitabine and oxaliplatin for advanced esophagogastric cancer. *N Engl J Med* 2008;358:36-46.

**Supplement A: Treatment Exposure**

|                                      | <b>ECF<br/>n=250</b> | <b>ECX<br/>n=243</b> | <b>EOF<br/>n=236</b> | <b>EOX<br/>n=239</b> |
|--------------------------------------|----------------------|----------------------|----------------------|----------------------|
| <b>Total no. of cycles delivered</b> | 1310                 | 1400                 | 1285                 | 1295                 |
| <b>Median No cycles</b>              | 6                    | 6                    | 6                    | 6                    |
| <b>p-value*</b>                      |                      | 0.021                | 0.323                | 0.426                |
| <b>Fluoropyrimidine (% dose)</b>     | 90.5                 | 88.4                 | 88.3                 | 88.1                 |
| <b>p-value*</b>                      |                      | 0.185                | 0.242                | 0.116                |
| <b>Platinum dose (% dose)</b>        | 92.6                 | 92.3                 | 91.7                 | 91.6                 |
| <b>p-value*</b>                      |                      | 0.836                | 0.261                | 0.163                |
| <b>Epirubicin (% dose)</b>           | 92.6                 | 89.2                 | 93.0                 | 91.9                 |
| <b>p-value*</b>                      |                      | 0.003                | 0.571                | 0.372                |
| <b>% of patients with a delay</b>    | 58.8%                | 60.1%                | 47.9%                | 50.2%                |
| <b>Mean days delayed per pat</b>     | 7.7                  | 11.2                 | 5.8                  | 7.4                  |
| <b>p-value*</b>                      |                      | 0.121                | 0.01                 | 0.072                |

\*Compared to ECF
